# Supplementary material for: Spatiotemporal Dengue Fever Incidence Associated with Climate in a Brazilian Tropical Region
Source: MDPI journal article supplement (doi:10.3390/geographies3040035), 2023-10-19
Supplement: s1 [file s1]

**Table S1.** Healthcare territories in Mato Grosso state, Brazil.

| ID | Healthcare territories | Headquarters          | Municipalities                                                                                                                                                                                                                                                     |
|----|------------------------|-----------------------|--------------------------------------------------------------------------------------------------------------------------------------------------------------------------------------------------------------------------------------------------------------------|
| 1  | Alto Tapajós           | Alta Floresta         | Alta floresta, Apiacás, Carlinda, Nova Bandeirantes, Nova Monte Verde, Paranaíta                                                                                                                                                                                   |
| 2  | Araguaia Xingú         | Porto Alegre do Norte | Porto Alegre do Norte, Canabrava do Norte, Confresa, Santa Cruz do Xingú, Santa Terezinha, São José do Xingú, Vila Rica                                                                                                                                            |
| 3  | Baixada Cuiabana       | Cuiabá                | Cuiabá, Acorizal, Barão de Melgaço, Chapada dos Guimarães, Jangada, Nossa Senhora do Livramento, Nova Brasilândia, Planalto da Serra, Poconé, Santo Antônio de Leverger, Várzea Grande                                                                             |
| 4  | Centro Norte           | Diamantino            | Diamantino, Alto Paraguai, Nobres, Nortelândia, Nova Maringá, Rosário Oeste, São José do Rio Claro                                                                                                                                                                 |
| 5  | Garças Araguaia        | Barra do Garças       | Barra do Garças, Araguaiana, Campinápolis, General Carneiro, Nova Xavantina, Novo São Joaquim, Pontal do Araguaia, Ponte Branca, Ribeirãozinho, Torixoréu                                                                                                          |
| 6  | Médio Araguaia         | Água Boa              | Água Boa, Bom Jesus do Araguaia, Canarana, Cocalinho, Gaúcha do Norte, Nova Nazaré, Querência, Ribeirão Cascalheira                                                                                                                                                |
| 7  | Médio Norte            | Tangará da Serra      | Tangará da Serra, Arenápolis, Barra do Bugres, Campo Novo do Parecis, Denise, Nova Marilândia, Nova Olímpia, Porto Estrela, Santo Afonso, Sapezal                                                                                                                  |
| 8  | Noroeste               | Juína                 | Juína, Aripuanã, Brasnorte, Castanheira, Colniza, Cotriguaçu, Juruena                                                                                                                                                                                              |
| 9  | Norte Araguaia Karajá  | São Félix do Araguaia | São Félix do Araguaia, Alto Boa Vista, Luciara, Novo Santo Antônio, Serra Nova Dourada                                                                                                                                                                             |
| 10 | Norte                  | Colíder               | Colíder, Itaúba, Marcelândia, Nova Canaã do Norte, Nova Guarita, Nova Santa Helena                                                                                                                                                                                 |
| 11 | Oeste                  | Cáceres               | Cáceres, Araputanga, Curvelândia, Glória d'Oeste, Indiavaí, Lambari d'Oeste, Mirassol d'Oeste, Porto Esperidião, Reserva do Cabaçal, Rio Branco, Salto do Céu, São José dos Quatro Marcos                                                                          |
| 12 | Sudoeste               | Pontes e Lacerda      | Pontes e Lacerda, Campos de Júlio, Comodoro, Conquista d'Oeste, Figueirópolis d'Oeste, Jauru, Nova Lacerda, Rondolândia, Vale de São Domingos, Vila Bela da Santíssima Trindade                                                                                    |
| 13 | Sul                    | Rondonópolis          | Rondonópolis, Alto Araguaia, Alto Garças, Alto Taquari, Araguaína, Campo Verde, Dom Aquino, Guiratinga, Itiquira, Jaciara, Juscimeira, Paranatinga, Pedra Preta, Poxoréo, Primavera do Leste, Santo Antônio do Leste, São José do Povo, São Pedro da Cipa, Tesouro |
| 14 | Teles Pires            | Sinop                 | Sinop, Cláudia, Feliz Natal, Ipiranga do Norte, Itanhangá, Lucas do Rio Verde, Nova Mutum, Nova Ubiratã, Santa Carmem, Santa Rita do Trivelato, Sorriso, Tapurah, União do Sul, Vera                                                                               |
| 15 | Vale do Arinos         | Juara                 | Juara, Novo Horizonte do Norte, Porto dos Gaúchos, Tabaporã                                                                                                                                                                                                        |
| 16 | Vale do Peixoto        | Peixoto de Azevedo    | Peixoto de Azevedo, Guarantã do Norte, Matupá, Novo Mundo, Terra Nova do Norte                                                                                                                                                                                     |
